# Supplementary material for: Glucose-6-phosphate dehydrogenase activity measured by spectrophotometry and associated genetic variants from the Oromiya zone, Ethiopia
Source: Springer Nature journal article supplement (doi:10.1186/s12936-018-2510-3), 2018-10-12
Supplement: MOESM1 [file 16195202]

## Day 0 (Recruitment)

Health Centre: \_\_\_\_\_

Date: \_\_\_\_/\_\_\_\_/\_\_\_\_

Patient: \_\_\_\_\_

ID No: \_\_\_\_\_

Address/mobile number: \_\_\_\_\_

Did the subject/or subject's representative sign the inform consent form?

Yes                       **No → Do not proceed!**

Age: \_\_\_\_\_ (years) **!!! ≥ 4 years !!!**

Sex:                       male                           female   

Origin:                       city                           rural

Temperature (°C): \_\_\_\_\_                      Weighth (kg): \_\_\_\_\_

|                         |
|-------------------------|
| <u>Medical history:</u> |
|-------------------------|

| Any symptoms            | <input type="checkbox"/> No | If yes, please specify modality                                                                 | Onset of symptoms |
|-------------------------|-----------------------------|-------------------------------------------------------------------------------------------------|-------------------|
| Fever                   |                             | (°C) ( <b>Exclusion criteria!</b> )                                                             |                   |
| Shivering               |                             | <input type="checkbox"/> mild <input type="checkbox"/> moderate <input type="checkbox"/> severe |                   |
| Headache                |                             | <input type="checkbox"/> mild <input type="checkbox"/> moderate <input type="checkbox"/> severe |                   |
| Nausea                  |                             | <input type="checkbox"/> mild <input type="checkbox"/> moderate <input type="checkbox"/> severe |                   |
| Diarrhoea               |                             | <input type="checkbox"/> mild <input type="checkbox"/> moderate <input type="checkbox"/> severe |                   |
| Abdominal pain          |                             | <input type="checkbox"/> mild <input type="checkbox"/> moderate <input type="checkbox"/> severe |                   |
| Others (please specify) |                             | <input type="checkbox"/> mild <input type="checkbox"/> moderate <input type="checkbox"/> severe |                   |

Any symptoms for malaria?                       **Yes (→ Exclusion)**                       No

**If yes, immediate referral to health centre or Jimma university hospital.**

Is the female subject pregnant or breastfeeding?                       Yes                       No

Does the patient have any known illnesses?                       Yes                       No

If yes please mention in subject's history above.

Does the subject have any allergies?                       Yes                       No

If yes please mention in subject's history above.

Does the subject remember an episode of haemolysis?                       Yes                       No

If yes please mention in subject's history above.

Does the subject remember side effects after drug intake?  Yes  No

Which drugs? \_\_\_\_\_

Did the subject ever receive blood transfusion?  Yes  No

Why? \_\_\_\_\_

Does the subject currently take any medicine regularly?  Yes  No

If yes please mention: \_\_\_\_\_ (Why? Check medical history)

***Laboratory Work***

EDTA blood taken  Yes

***Next appointment***

Date \_\_\_/\_\_\_/\_\_\_\_\_ Time: \_\_\_/\_\_\_

\_\_\_\_\_  
Date, Place

\_\_\_\_\_  
Researcher's Name, Signature

**Thank you!**

## Laboratory Results Day 0

Health Centre: \_\_\_\_\_

Date: \_\_\_\_/\_\_\_\_/\_\_\_\_

ID No: \_\_\_\_\_

Haemoglobin measured?  Yes  
Haemoglobin Results (mg/dl)  Normal  **Abnormal (see age scale)**  
**→Iron supplementation**  
Filter papers prepared (6 x 15 µL)?  Yes  
Thin and thick smear prepared?  Yes

Rapid Test G6PD-Enzyme Activity:  Normal  **Deficient**

Rapid Test Malaria:  negative  **positive** if positive, species: \_\_\_\_\_

Filter papers packed and frozen?  Yes

*Thin and thick smear:*

negative   positive (/µL: \_\_\_\_\_ Species: \_\_\_\_\_)

Gametocytes seen?  No  Yes (/µL: \_\_\_\_\_)

**If malaria positive:**

Patient informed and referred for treatment?  Yes  No

\_\_\_\_\_  
Date, Place

\_\_\_\_\_  
Researcher's Name, Signature

**Thank you!**

## Visit 2 (Follow-up)

Health Centre: \_\_\_\_\_

Date: \_\_\_\_/\_\_\_\_/\_\_\_\_

Patient: \_\_\_\_\_

ID No: \_\_\_\_\_

Address: \_\_\_\_\_

Had the subject a positive malaria test at day 0?            **No**            **Yes**

**If yes (→ Proceed with CRF “Malaria patient follow-up”)**

G6PD-Enzyme Activity:            Normal            **Deficient**

G6PD Card given            **Yes**            No

G6PD Information given            **Yes**            No

---

Date, Place

---

Researcher's Name, Signature

**Thank you!**

## Malaria Patient Follow-up

Health Centre: \_\_\_\_\_

Date: \_\_\_\_/\_\_\_\_/\_\_\_\_

Patient: \_\_\_\_\_

ID No: \_\_\_\_\_

Had the subject a positive malaria test at day 0?       No       Yes

*Rapid Test Malaria*

negative     positive      if positive, species: \_\_\_\_\_

*Thin and thick smear:*

negative     positive (/μL: \_\_\_\_\_ Species: \_\_\_\_\_

Patient already treated against malaria?       Yes       No

Drug: \_\_\_\_\_

**If no, referral to health centre or Jimma university hospital for malaria treatment!**

Patient history since day 0:

  
  
  
  
  

| Symptoms since day 0 | NO | If yes, please specify modality                                                                 | Onset/end of symptoms | Causality (1=related, 2=probable 3=possible, 4=unrelated)                                                   |
|----------------------|----|-------------------------------------------------------------------------------------------------|-----------------------|-------------------------------------------------------------------------------------------------------------|
| Fever                |    | (°C)                                                                                            |                       | <input type="checkbox"/> 1 <input type="checkbox"/> 2 <input type="checkbox"/> 3 <input type="checkbox"/> 4 |
| Shivering            |    | <input type="checkbox"/> mild <input type="checkbox"/> moderate <input type="checkbox"/> severe |                       | <input type="checkbox"/> 1 <input type="checkbox"/> 2 <input type="checkbox"/> 3 <input type="checkbox"/> 4 |
| Headache             |    | <input type="checkbox"/> mild <input type="checkbox"/> moderate <input type="checkbox"/> severe |                       | <input type="checkbox"/> 1 <input type="checkbox"/> 2 <input type="checkbox"/> 3 <input type="checkbox"/> 4 |
| Nausea               |    | <input type="checkbox"/> mild <input type="checkbox"/> moderate <input type="checkbox"/> severe |                       | <input type="checkbox"/> 1 <input type="checkbox"/> 2 <input type="checkbox"/> 3 <input type="checkbox"/> 4 |
| Diarrhea             |    | <input type="checkbox"/> mild <input type="checkbox"/> moderate <input type="checkbox"/> severe |                       | <input type="checkbox"/> 1 <input type="checkbox"/> 2 <input type="checkbox"/> 3 <input type="checkbox"/> 4 |
| Abdominal pain       |    | <input type="checkbox"/> mild <input type="checkbox"/> moderate <input type="checkbox"/> severe |                       | <input type="checkbox"/> 1 <input type="checkbox"/> 2 <input type="checkbox"/> 3 <input type="checkbox"/> 4 |
| Others (specify)     |    | <input type="checkbox"/> mild <input type="checkbox"/> moderate <input type="checkbox"/> severe |                       | <input type="checkbox"/> 1 <input type="checkbox"/> 2 <input type="checkbox"/> 3 <input type="checkbox"/> 4 |

Any symptoms for malaria or other acute diseases now?       Yes       No

**If yes, immediate referral to health centre or Jimma university hospital!**

|                                                        |                          |            |                          |                                             |
|--------------------------------------------------------|--------------------------|------------|--------------------------|---------------------------------------------|
| G6PD-Enzyme Activity:                                  | <input type="checkbox"/> | Normal     | <input type="checkbox"/> | <b>Deficient</b>                            |
| G6PD Card given                                        | <input type="checkbox"/> | <b>Yes</b> | <input type="checkbox"/> | No                                          |
| G6PD Information given                                 | <input type="checkbox"/> | <b>Yes</b> | <input type="checkbox"/> | No                                          |
| Indication for primaquine?                             | <input type="checkbox"/> | Yes*       | <input type="checkbox"/> | No                                          |
| * <i>Plasmodium vivax</i> or <i>P. ovale</i> infection |                          |            |                          |                                             |
| Contraindication for primaquine                        | <input type="checkbox"/> | No         | <input type="checkbox"/> | <b>Yes (→ No primaquine!!!)<sup>§</sup></b> |

<sup>§</sup>Pregnancy, lactation, age < 4 years, G6PD deficiency, known allergy against primaquine

*Treatment*

|                   |                          |     |                          |    |
|-------------------|--------------------------|-----|--------------------------|----|
| Primaquine given? | <input type="checkbox"/> | Yes | <input type="checkbox"/> | No |
|-------------------|--------------------------|-----|--------------------------|----|

(0.5 mg/kg KG once daily for 14 days given)

This treatment has to be combined with the standard chloroquine therapy.

---

Date, Place

---

Researcher's Name, Signature

**Thank you!**

# Drop Out Form

Health Centre: \_\_\_\_\_

Date: \_\_\_\_/\_\_\_\_/\_\_\_\_

Patient: \_\_\_\_\_

ID No: \_\_\_\_\_

- Screening Failure

Reason: \_\_\_\_\_

- Lost to Follow-up:

Explanation:- \_\_\_\_\_

- Withdrawal:

Reason:- \_\_\_\_\_

- Protocol violation:

Explanation:- \_\_\_\_\_

\_\_\_\_\_  
Date, Place

\_\_\_\_\_  
Researcher's Name, Signature

**Thank you!**
