# Supplementary material for: Glucose-6-phosphate dehydrogenase activity measured by spectrophotometry and associated genetic variants from the Oromiya zone, Ethiopia
Source: Springer Nature journal article supplement (doi:10.1186/s12936-018-2510-3), 2018-10-12
Supplement: MOESM2 [file 16195202]

# Glucose-6-phosphatdehydrogenase (G6PD) Enzyme Deficiency Card

Name: \_\_\_\_\_

Birth date: \_\_\_\_\_

Address: \_\_\_\_\_

The above named person has a G6PD enzyme deficiency of \_\_\_\_\_%.

This means a moderate/severe enzyme deficiency, most probably with an African variant. It was tested at Jimma University Hospital on \_\_\_\_\_.

G6PD enzyme deficiency is an inherited disease of the red blood cell. It is not infectious but can be dangerous for the patient if certain drugs are administered. Those drugs can cause life-threatening haemolyses (destruction of red blood cells). Depending on the gene mutation (African, Asian, Mediterranean variant), some of the drugs are more or less dangerous.

The following drugs should not be given (high risk):

|                                                |                                                 |
|------------------------------------------------|-------------------------------------------------|
| Acetanilide (acetanilid)                       | C <sub>8</sub> H <sub>9</sub> N O               |
| Acetylphenylhydrazine (2-Phynylacetohydrazide) | C <sub>8</sub> H <sub>10</sub> N <sub>2</sub> O |

|                                                             |                                                                                               |
|-------------------------------------------------------------|-----------------------------------------------------------------------------------------------|
| Aldesulfone sodium (sulfoxone)                              | C <sub>14</sub> H <sub>14</sub> N <sub>2</sub> Na <sub>2</sub> O <sub>6</sub> S <sub>3</sub>  |
| Arsine                                                      | As-H <sub>3</sub>                                                                             |
| Beta-Naphthol (2-Naphthol)                                  | C <sub>10</sub> H <sub>8</sub> O                                                              |
| Chloramphenicol                                             | C <sub>11</sub> H <sub>12</sub> C <sub>12</sub> N <sub>2</sub> O <sub>5</sub>                 |
| Chloroquine                                                 | C <sub>18</sub> H <sub>26</sub> Cl N <sub>3</sub>                                             |
| Ciprofloxacin                                               | C <sub>17</sub> H <sub>18</sub> F N <sub>3</sub> O <sub>3</sub>                               |
| Dapsone (diaphenylsulfone)                                  | C <sub>12</sub> H <sub>12</sub> N <sub>2</sub> O <sub>2</sub> S                               |
| Dimercaprol                                                 | C <sub>3</sub> H <sub>8</sub> O S <sub>2</sub>                                                |
| Doxorubicin                                                 | C <sub>27</sub> H <sub>29</sub> N O <sub>11</sub>                                             |
| Furazolidone                                                | C <sub>8</sub> H <sub>7</sub> N <sub>3</sub> O <sub>5</sub>                                   |
| Glibenclamide                                               | C <sub>32</sub> H <sub>28</sub> Cl N <sub>3</sub> O <sub>5</sub> S                            |
| Glucosulfone (glucosulfone sodium)                          | C <sub>24</sub> H <sub>34</sub> N <sub>2</sub> Na <sub>2</sub> O <sub>18</sub> S <sub>3</sub> |
| Isobutyl Nitrite                                            | C <sub>4</sub> H <sub>9</sub> N O <sub>2</sub>                                                |
| Menadiol Sodium Sulfate (Vitamin k4 sodium sulfate)         | C <sub>11</sub> H <sub>8</sub> Na <sub>2</sub> O <sub>8</sub> S <sub>2</sub>                  |
| Menadione (menaphtone)                                      | C <sub>11</sub> H <sub>8</sub> O <sub>2</sub>                                                 |
| Menadione sodium Bisulfite (Vitamin K3 sodium bisulfite)    | C <sub>11</sub> H <sub>8</sub> O <sub>2</sub> NaHSO <sub>3</sub>                              |
| Mepacrine (Quinacrine)                                      | C <sub>23</sub> H <sub>30</sub> Cl N <sub>3</sub> O                                           |
| Mesalazine - 5-Aminosalicylic Acid (paraminosalicylic acid) | C <sub>7</sub> H <sub>7</sub> N O <sub>3</sub>                                                |
| metamizole                                                  | C <sub>13</sub> H <sub>16</sub> N <sub>3</sub> NaO <sub>4</sub> S                             |
| Methyltinionium Chloride (methylene blue)                   | C <sub>16</sub> H <sub>18</sub> Cl N <sub>3</sub> S                                           |
| Nalidixic Acid                                              | C <sub>12</sub> H <sub>12</sub> N <sub>2</sub> O <sub>3</sub>                                 |
| Naphtalene, Pure (naphtalin)                                | C <sub>10</sub> H <sub>8</sub>                                                                |
| Niridazole                                                  | C <sub>6</sub> H <sub>6</sub> N <sub>4</sub> O <sub>3</sub> S                                 |
| Nitrofur (nitrofurazone)                                    | C <sub>6</sub> H <sub>6</sub> N <sub>4</sub> O <sub>4</sub>                                   |
| Nitrofurantoin                                              | C <sub>8</sub> H <sub>6</sub> N <sub>4</sub> O <sub>5</sub>                                   |
| O-Acetylsalicylic Acid (acetylsalicylic acid)               | C <sub>9</sub> H <sub>8</sub> O <sub>4</sub>                                                  |

|                                                                                          |                      |
|------------------------------------------------------------------------------------------|----------------------|
| Oxidase, Urate (urate oxidase)                                                           |                      |
| Pamaquine                                                                                | C42 H45 N3 O7        |
| Pentaquine                                                                               | C18 H27 N3 O         |
| Phenacetin (acetophenetidin)                                                             | C10 H13 N O2         |
| Phenazopyridine                                                                          | C11 H11 N5           |
| Phynylhydrazine                                                                          | C6 H8 N2             |
| Primaquine                                                                               | C15 H21 N3 O         |
| Probenecid                                                                               | C13 H19 NO4 S        |
| Stibophen (2-(2-Oxido-3,5-Disulphonatophenoxy)-1,3,2-Benzodioxastibole-4-6-Disulphonate) | C12 H4 Na5 O16 S4 Sb |
| Sulfacetamide                                                                            | C8 H10 N2 O3 S       |
| Sulfadimidine                                                                            | C12 H14 N4 O2 S      |
| Sulfafurazole (sulfafurazone, sulfisoxazole)                                             | C11 H13 N3 O3 S      |
| Sulfamethoxazole                                                                         | C10 H11 N3 O3 S      |
| Sulfanilamide (Sulphanilamide)                                                           | C6 H8 N2 O2 S        |
| Sulfapyridine                                                                            | C11 H11 N3 O2 S      |
| Sulfasalazine, Salazosulfapyridine (salazopyrin)                                         | C18 H14 N4 O5 S      |
| Thiazosulfone (thiazolesulfone)                                                          | C9 H9 N3 O2 S2       |
| Tolonium Chloride, Tolonium Chloride (toluidine blue)                                    | C15 H16 Cl N3 S      |
| Trinitrotoluene (2,4,6-Trinitrotoluene)                                                  | C7 H5 N3 O6          |

Following drugs are low risk drugs:

- Acetaminophen (**paracetamol**, Tylenol, Tralgon)
- Acetophenetidin (phenacetin)
- Aminopyrine (Pyramidon, amidopyrine)
- Antazoline (Antistine)
- Antipyrine
- Ascorbic acid (vitamin C)
- Benzhexol (Artane)
- Chloramphenicol [high risk for Mediterranean/Asian variants]
- Chlorguanidine (Proguanil, Paludrine)
- Chloroquine
- Colchicine
- Diphenhydramine (Benadryl)
- Isoniazid
- L-Dopa
- Menadione sodium bisulfite (Hykinone)
- Menaphthone
- *p*-Aminobenzoic acid
- Phenylbutazone
- Phenytoin
- Probenecid (Benemid)
- Procain amide hydrochloride (Pronestyl)
- Pyrimethamine (Daraprim)
- Quinidine
- Quinine
- Streptomycin
- Sulfacytine
- Sulfadiazine
- Sulfaguanidine
- Sulfamerazine
- Sulfamethoxypyridazine (Kynex)
- Sulfisoxazole (Gantrisin)
- Trimethoprim
- Tripelennamine (pyribenzamine)
- Vitamin K
