# Supplementary material for: Glucose-6-phosphate dehydrogenase activity measured by spectrophotometry and associated genetic variants from the Oromiya zone, Ethiopia
Source: Springer Nature journal article supplement (doi:10.1186/s12936-018-2510-3), 2018-10-12
Supplement: MOESM3 [file 16195202]

## **Kaardii hirrina inzaayimii Giluukoos-6-fosfeeti dihayidiroojineesii (G-6-FD)**

Maqaa: \_\_\_\_\_.

Guyyaa dhalootaa: \_\_\_\_\_.

Teessoo: \_\_\_\_\_.

Namichi/ttiin maqaan isaa/shee kanaa olitti caqasame/te kun hirrina G-6-FD \_\_\_\_\_% qaba/di. Kana jechuunis hirrina giddugaleessa ykn cimaa inzaayimichaa, garaa-garummaa Afiriikummaa ta'uu ni mala. Qorannoon kun hospitaala yuniversiitii Jimmaatti guyyaa \_\_\_\_\_ hojjetame.

Hirrinna inzaayimii G-6-FD kun gosaan dhalootaa gara dhalootaatti kan darbu ta'ee dhukkuba

seelii dhiiga diimaa ti. Dhukkuba ilbiisota ijaan hin argamneen kan daddarbu utuu hin ta'in dhukkubsattoonni yeroo qorichaalee tokko tokko fudhatanu kan cimuu danda'uudha.

Korichootni kun seelii dhiiga diimaa barbadeessuudhaan hanga lubbuu baasuutti deemuu danda'u. Addaddummaa idda dhalootaatiin (Afiriikaa, Eeziyaa, Meditaraaniyaan, kkf) qorichootiin murtaa'ani miidhaa cimaa ykn laafaa ta'uu ni danda'u.

Odeeffannoon dhukkuba kanaa qorannoo inzaayimii godhatanii ji'a 3n booda hospitaala Yunivarsiitii Jimmaatti Dr. Sintaayyoo Fiqaaduutiin kennamuu ni danda'a.

Qorichootni kanaan gaditti caqasaman rakkina cimaa waan huumaaniif kennamuu hin qabanu.

|                                                        |                      |
|--------------------------------------------------------|----------------------|
| Asitaaniilamaayid (asitaaniliid)                       | C8 H9 N O            |
| Asetiilfeniilhayidiraziin(2-Feniilasetohayidraazaayid) | C8 H10 N2 O          |
| Aldeesalfoon soodiyeem (salfoksoon)                    | C14 H14 N2 Na2 O6 S3 |
| Arsiin                                                 | As-H3                |
| Beettaa-naaftool (2-naaftool)                          | C10 H8O              |
| Kiloraamfenikool                                       | C11 H12 C12 N2 O5    |
| Kilorokiin                                             | C18 H26 Cl N3        |
| Sippiroofiloksaasiin                                   | C17 H18 F N3 O3      |
| Dapsoon (diyafenylsalfoon)                             | C12 H12 N2 O2 S      |
| Dayimerkappiirool                                      | C3 H8 O S2           |
| Doksoruubisiin                                         | C27 H29 N O11        |
| Fuuraazoliidoon                                        | C8 H7 N3 O5          |
| Gilibenkilaamaayid                                     | C32 H28 Cl N3 O5 S   |

|                                                                                          |                       |
|------------------------------------------------------------------------------------------|-----------------------|
| Gilukosalfoon (gilukosalfoon soodiyeem)                                                  | C24 H34 N2 Na2 O18 S3 |
| Ayisobutiilnaayitiraayit                                                                 | C4 H9 N O2            |
| Menadiyol sodiyeem salfeet (vaayitamin k4 soodiyeem salfeet)                             | C11 H8 Na2 O8 S2      |
| Meppaakiriin (kuyinaakiriin)                                                             | C11 H8 O2             |
| Meesaalaaziin-5-amiinoosalisiliik asiid (paaraamiinoosalisiliik asiid)                   | C7 H7 N O3            |
| Metaamizool                                                                              | C13H16N3NaO4S         |
| Meetiiltiyoonyeem kilooraayid (meetiliin biluu)                                          | C16 H18 Cl N3 S       |
| Nalidiksiik asiid                                                                        | C12 H12 N2 O3         |
| Naftaaliin                                                                               | C10 H8                |
| Niridaazool                                                                              | C6 H6 N4 O3 S         |
| Nayitiroofural (nayitiroofuraazon)                                                       | C6 H6 N4 O4           |
| Nitrofurantoin                                                                           | C8 H6 N4 O5           |
| O-Acetylsalicylic Acid (acetylsalicylic acid)                                            | C9 H8 O4              |
| Oxidase, Urate (urate oxidase)                                                           |                       |
| Pamaquine                                                                                | C42 H45 N3 O7         |
| Pentaquine                                                                               | C18 H27 N3 O          |
| Phenacetin (acetophenetidin)                                                             | C10 H13 N O2          |
| Phenazopyridine                                                                          | C11 H11 N5            |
| Phynylhydrazine                                                                          | C6 H8 N2              |
| Primaquine                                                                               | C15 H21 N3 O          |
| Probenecid                                                                               | C13 H19 NO4 S         |
| Stibophen (2-(2-Oxido-3,5-Disulphonatophenoxy)-1,3,2-Benzodioxastibole-4-6-Disulphonate) | C12 H4 Na5 O16 S4 Sb  |
| Sulfacetamide                                                                            | C8 H10 N2 O3 S        |
| Sulfadimidine                                                                            | C12 H14 N4 O2 S       |
| Sulfafurazole (sulfafurazone, sulfisoxazole)                                             | C11 H13 N3 O3 S       |
| Sulfamethoxazole                                                                         | C10 H11 N3 O3 S       |
| Sulfanilamide (Sulphanilamide)                                                           | C6 H8 N2 O2 S         |

|                                                       |                 |
|-------------------------------------------------------|-----------------|
| Sulfapyridine                                         | C11 H11 N3 O2 S |
| Sulfasalazine, Salazosulfapyridine (salazopyrin)      | C18 H14 N4 O5 S |
| Thiazosulfone (thiazolesulfone)                       | C9 H9 N3 O2 S2  |
| Tolonium Chloride, Tolonium Chloride (toluidine blue) | C15 H16 Cl N3 S |
| Trinitrotoluene (2,4,6-Trinitrotoluene)               | C7 H5 N3 O6     |

- Acetaminophen (paracetamol, Tylenol, Tralgon)
- Acetophenetidin (phenacetin)
- Aminopyrine (Pyramidon, amidopyrine)
- Antazoline (Antistine)
- Antipyrine
- Ascorbic acid (vitamin C)
- Benzhexol (Artane)
- Chloramphenicol [high risk for Mediterranean/Asian variants]
- Chlorguanidine (Proguanil, Paludrine)
- Chloroquine
- Colchicine
- Diphenhydramine (Benadryl)
- Isoniazid
- L-Dopa
- Menadione sodium bisulfite (Hykinone)
- Menaphthone
- *p*-Aminobenzoic acid
- Phenylbutazone
- Phenytoin
- Probenecid (Benemid)
- Procain amide hydrochloride (Pronestyl)
- Pyrimethamine (Daraprim)
- Quinidine
- Quinine
- Streptomycin
- Sulfacytine
- Sulfadiazine
- Sulfaguanidine
- Sulfamerazine
- Sulfamethoxypyridazine (Kynex)
- Sulfisoxazole (Gantrisin)
- Trimethoprim
- Tripelennamine (pyribenzamine)
- Vitamin K
