# Supplementary material for: Glucose-6-phosphate dehydrogenase activity measured by spectrophotometry and associated genetic variants from the Oromiya zone, Ethiopia
Source: Springer Nature journal article supplement (doi:10.1186/s12936-018-2510-3), 2018-10-12
Supplement: MOESM4 [file 16195202]

**ግሉኮስ-6-ፖስፌት ድሃድሮጅኔስ (ግ6ፖዲ) ኢንዛይም እጥረት ካርድ**

ስም:- \_\_\_\_\_

የልደት ቀን :- \_\_\_\_\_

አድራሻ:- \_\_\_\_\_

ከላይ በስም ተጠቃሹ ግ6ፖድ ኢንዛይም እጥረት \_\_\_\_\_% አለው።

ይህም ማለት መጠነኛ/የከፋ ኢንዛይም እጥረት፣ ምናልባት የአፍሪካዊ ልዩነት ሊሆን ይችላል። ምርመራው ጅም ዩኒቨርሲቲ ሆስፒታል በ ተሰርዕል።

ግ6ፖድ ኢንዛይም እጥረት በዘር የሚተላለፍ የቀይ ደም ህዋስ በሽታ ነው። ተላላፊ በሽታ አይደለም ነገር ግን ህመምተኞች የተወሰኑ መድሃኒቶችን ሲወስዱ በጣም አደገኛ ነው። እነዚያ የተወሰኑ መድሃኒቶች ህልፈተ-ህይወት የሚያደርስ በሽታ (የቀይ ደም ህዋስ መጥፋትን) ያስከትላሉ።

እንደዘር ልዩነታችን በሽታ (አፍሪካ፣ ኤስያ፣ሜደትራኒያን ል ዩነቶች)፣ የተወሰኑት መድሃኒቶች ከፍ ያለ ወይም አነስተኛ ጎጂ ናቸው።

ስለዘር በሽታው መረጃ ኢንዛይሙን ከተመረመሩ 3 ወር በሁላ በ ዶ/ር ስንታየሁ ፍቃዱ ጅም ዩኒቨርሲቲ ላይ ሊሰጥ ይችላል።

የሚከተሉት መድሃኒቶች መሰጠት የለባቸውም (አደገኛ)

|                                           |                                                                                               |
|-------------------------------------------|-----------------------------------------------------------------------------------------------|
| አሴታሲኒሊድ (አሲታሲኒድ)                          | C <sub>8</sub> H <sub>9</sub> N O                                                             |
| አሴታይልፊናይልሃይድራዚን                           | C <sub>8</sub> H <sub>10</sub> N <sub>2</sub> O                                               |
| አልደሳለፎን ሱዲየም (ሳልፎክሶን)                     | C <sub>14</sub> H <sub>14</sub> N <sub>2</sub> Na <sub>2</sub> O <sub>6</sub> S <sub>3</sub>  |
| አረሲን                                      | As-H <sub>3</sub>                                                                             |
| ቤታ-ናፍቶል(2-ናፍቶል)                           | C <sub>10</sub> H <sub>8</sub> O                                                              |
| ክሎርኦፕራይን                                  | C <sub>11</sub> H <sub>12</sub> C <sub>12</sub> N <sub>2</sub> O <sub>5</sub>                 |
| ክሎርኩየን                                    | C <sub>18</sub> H <sub>26</sub> Cl N <sub>3</sub>                                             |
| ሲፕሮፍሎክሳሲሊን                                | C <sub>17</sub> H <sub>18</sub> F N <sub>3</sub> O <sub>3</sub>                               |
| ዳፕሶን (ዲኦኔልሳልፎን)                           | C <sub>12</sub> H <sub>12</sub> N <sub>2</sub> O <sub>2</sub> S                               |
| ዲመረካፕሮል                                   | C <sub>3</sub> H <sub>8</sub> O S <sub>2</sub>                                                |
| ዶክሶሩቢሲን                                   | C <sub>27</sub> H <sub>29</sub> N O <sub>11</sub>                                             |
| ፋራዞሊድን                                    | C <sub>8</sub> H <sub>7</sub> N <sub>3</sub> O <sub>5</sub>                                   |
| ግሊቤክሳሚድ                                   | C <sub>32</sub> H <sub>28</sub> Cl N <sub>3</sub> O <sub>5</sub> S                            |
| ግሉኮሳልፎን (ግሉኮሳልፎን ሱዲየም)                    | C <sub>24</sub> H <sub>34</sub> N <sub>2</sub> Na <sub>2</sub> O <sub>18</sub> S <sub>3</sub> |
| አይሶቡታይል ናይትራይት                            | C <sub>4</sub> H <sub>9</sub> N O <sub>2</sub>                                                |
| መናዲኦል ሱዲየም ሳልፌት (ቫይታሚን ኬ 4 ሱዲየም ሳልፌት)     | C <sub>11</sub> H <sub>8</sub> Na <sub>2</sub> O <sub>8</sub> S <sub>2</sub>                  |
| ሜናዳይኦን (ሜናፍቶን)                            | C <sub>11</sub> H <sub>8</sub> O <sub>2</sub>                                                 |
| ሜናዳይኦን ሱዲየም ቢስልፊት (ቫይታሚን ኬ3 ሱዲየም ቢሳልፋይት)  | C <sub>11</sub> H <sub>8</sub> O <sub>2</sub> NaHSO <sub>3</sub>                              |
| ሜፓክሪን (ኩይናክራይን)                           | C <sub>23</sub> H <sub>30</sub> Cl N <sub>3</sub> O                                           |
| ሜሳላዚን-5-አሚኖሳሊሳይክሊክ አሲድ (ፓራአሚኖሳሊሳይክሊክ አሲድ) | C <sub>7</sub> H <sub>7</sub> N O <sub>3</sub>                                                |
| ሜታሚዞል                                     | C <sub>13</sub> H <sub>16</sub> N <sub>3</sub> NaO <sub>4</sub> S                             |
| ሜታይልቲይኦኒየም ክሎራይድ (ሜታይልን ብሉ)               | C <sub>16</sub> H <sub>18</sub> Cl N <sub>3</sub> S                                           |
